# Supplementary material for: Preparation of BCYF0.10–YDC/BCYF0.10–Ni dual-layer hollow fiber membrane for dry reforming of methane and hydrogen purification
Source: Royal Society of Chemistry journal article supplement (doi:10.1039/d3cy00595j), 2023-01-01
Supplement: d3cy00595j1.pdf [file d3cy00595j1.pdf]

## Supporting Information

### **Preparation of BCYF<sub>0.10</sub>-YDC/BCYF<sub>0.10</sub>-Ni dual-layer hollow fiber membrane for dry reforming of methane and hydrogen purification**

*Jie Wang,<sup>a</sup> Baolei Shao,<sup>a</sup> Claudia Li,<sup>b</sup> Jian Song,<sup>a,\*</sup> Bo Meng,<sup>a</sup> Xiuxia Meng,<sup>a</sup> Naitao Yang,<sup>a</sup> Sibudjing Kawi,<sup>b</sup> Jaka Sunarso,<sup>c,\*</sup> Xiaoyao Tan<sup>d</sup> and Shaomin Liu<sup>d</sup>*

<sup>a</sup> Department of Chemical Engineering, Shandong University of Technology, Zibo 255049, China

<sup>b</sup> Department of Chemical & Biomolecular Engineering, National University of Singapore, 117585, Singapore

<sup>c</sup> Research Centre for Sustainable Technologies, Faculty of Engineering, Computing and Science, Swinburne University of Technology, Jalan Simpang Tiga, 93350, Kuching, Sarawak, Malaysia

<sup>d</sup> State Key Laboratory of Separation Membranes and Membrane Processes, Department of Chemical Engineering, Tiangong University, Tianjin 300387, China

\*Corresponding authors: [jian.song@sdut.edu.cn](mailto:jian.song@sdut.edu.cn) (J. Song);  
[jsunarso@swinburne.edu.my](mailto:jsunarso@swinburne.edu.my) (J. Sunarso)

Tel: +86-533-2781681

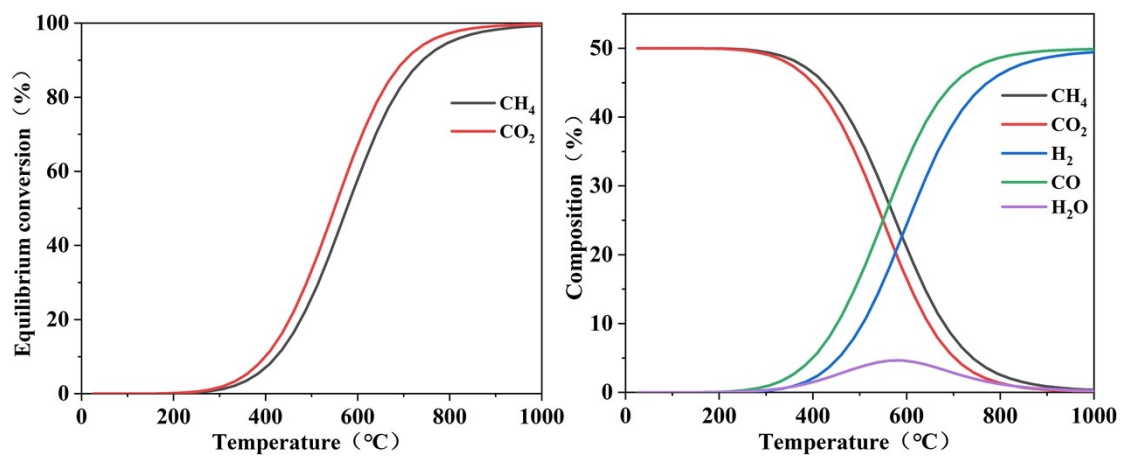

Fig. S1 Equilibrium conversion (Left: CH<sub>4</sub> and CO<sub>2</sub>) and composition (Right: H<sub>2</sub>, CO, CO<sub>2</sub>, H<sub>2</sub>O, CH<sub>4</sub>) at 900°C. Reaction pressure: atmosphere; CH<sub>4</sub>/CO<sub>2</sub> ratio: 1:1.

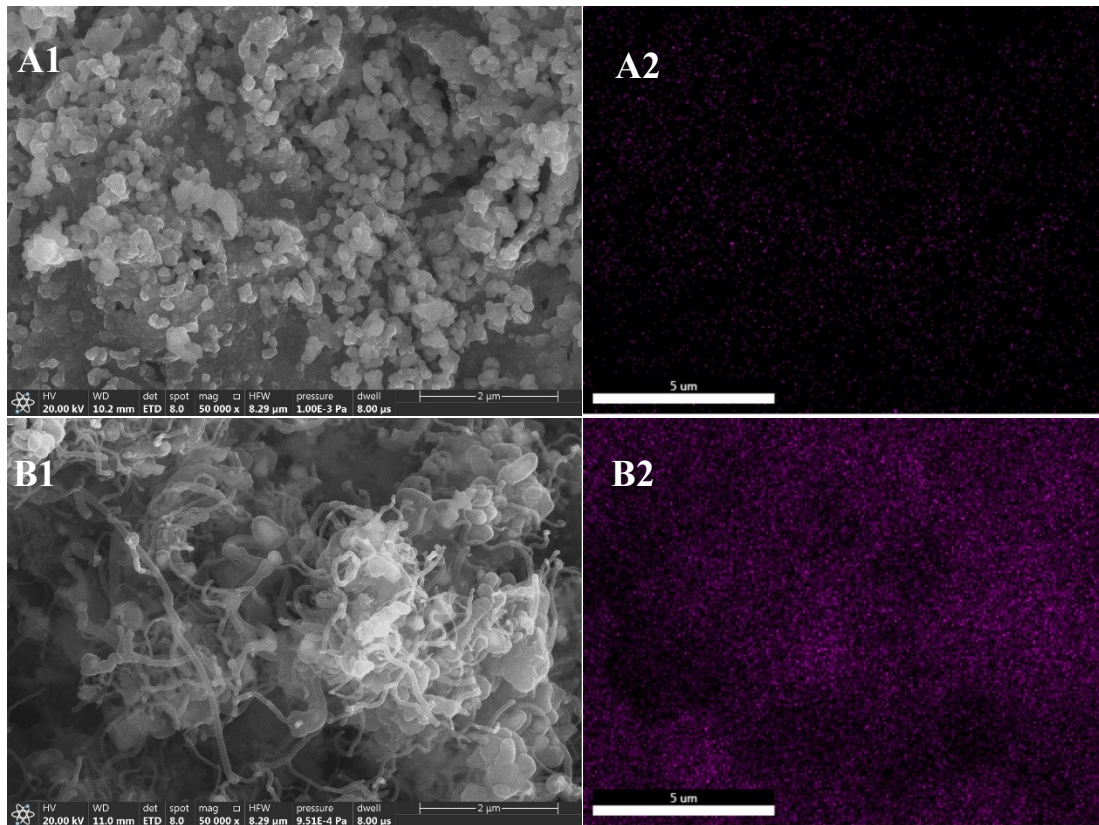

Fig. S2 EDS mapping of catalysts (A) before and (B) after short-term stability test.

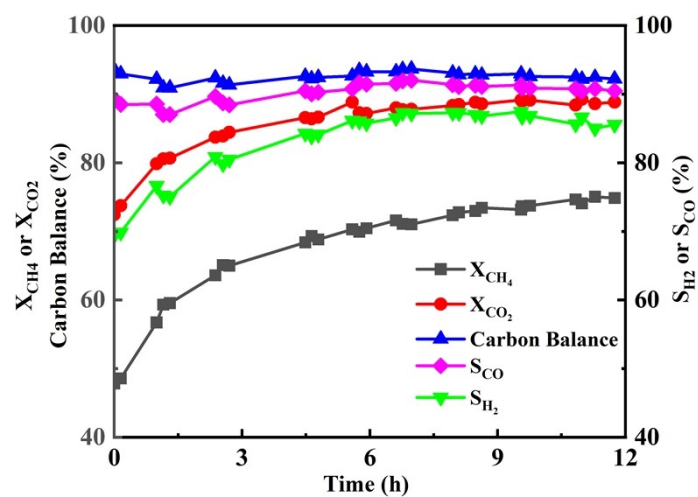

Fig. S3 Short-term stability of 30 wt.% Ni/BCYF0.10-YDC catalysts at 900 °C.
